# Supplementary material for: Insecticide resistance, fitness and susceptibility to Zika infection of an interbred Aedes aegypti population from Rio de Janeiro, Brazil
Source: PubMed Central journal article supplement (PMC7281914; doi:10.1186/s13071-020-04166-3), 2020-06-08

Acetylcholinesterase - AChE

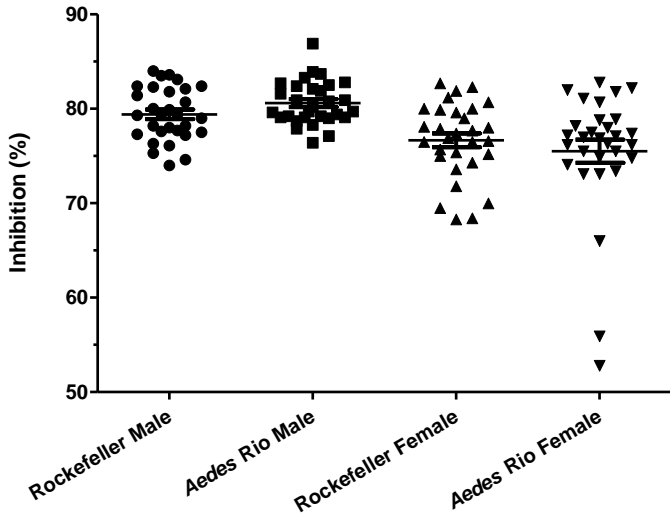

Glutathione S-Transferase - GST

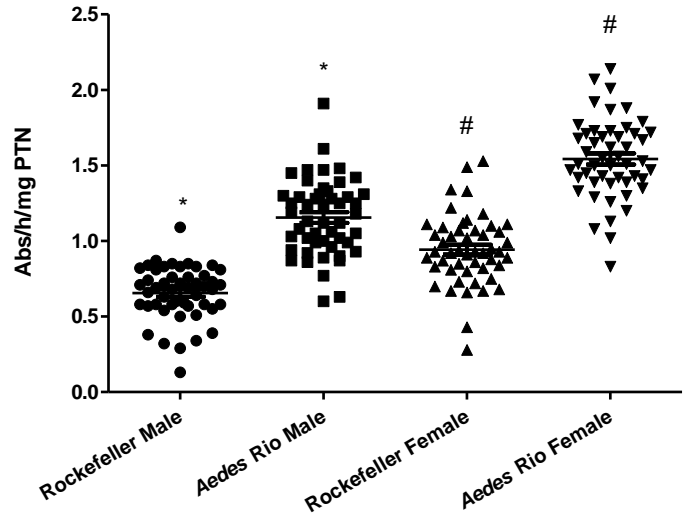

$\alpha$ -EST

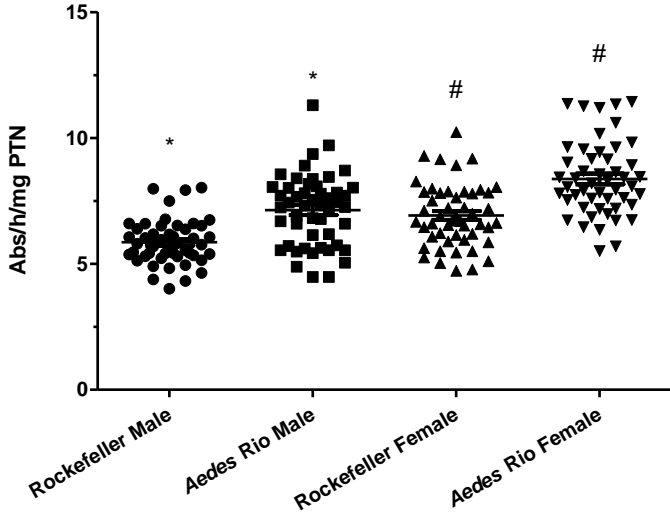

$\beta$ -EST

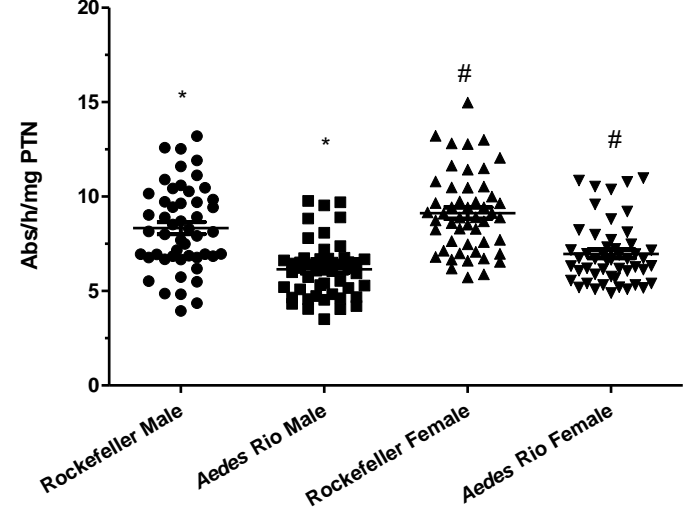

Mixed function oxidases - MFO

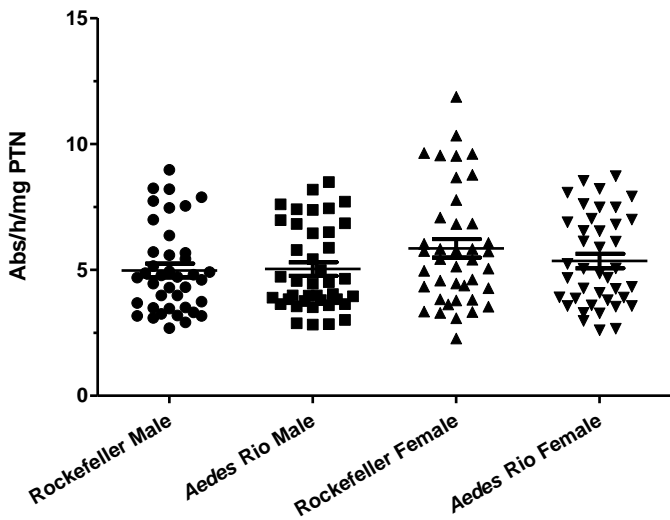

pNPA-EST

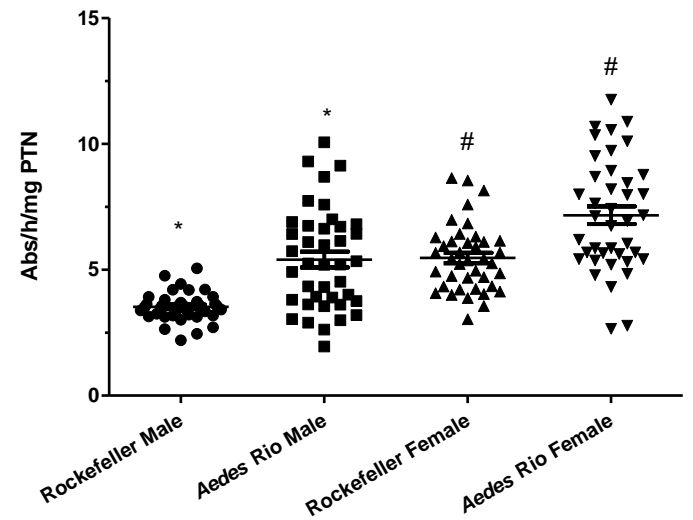

Supplement: 13071_2020_4166_MOESM1_ESM.pdf [file 13071_2020_4166_MOESM1_ESM.pdf]
